# Supplementary material
Source: MDPI journal article supplement (https://www.mdpi.com/2077-0472/12/12/2020)

**Table S1.** Data for the three years evaluation of the eight traits related to reproductive biology in lemon accessions considered in the present work.

| Accession                                                                     | pistil abortion (%) |      |      | atrophic anthers (%) |      |      | number of seed per fruit |       |       |
|-------------------------------------------------------------------------------|---------------------|------|------|----------------------|------|------|--------------------------|-------|-------|
|                                                                               | 2019                | 2021 | 2022 | 2019                 | 2021 | 2022 | 2019                     | 2020  | 2021  |
| Adamopoulos                                                                   | 0.93                | 0.74 | 0.50 | 0.10                 | 0.06 | 0.00 | 7.80                     | 9.30  | 5.30  |
| Akragas                                                                       | 0.23                | 0.15 | 0.10 | 0.10                 | -    | 0.01 | -                        | 4.00  | 1.00  |
| Cerza                                                                         | 0.90                | 0.58 | 0.57 | 0.17                 | 0.13 | 0.00 | -                        | -     | -     |
| Chaparro                                                                      | 0.70                | 0.58 | 0.33 | 0.30                 | 0.01 | 0.00 | 11.70                    | 16.00 | 15.00 |
| Cirò                                                                          | 0.80                | -    | -    | 0.20                 | -    | -    | -                        | 1.10  | 1.00  |
| Erice                                                                         | 0.16                | -    | 0.19 | 0.09                 | -    | 0.05 | -                        | 2.40  | 4.50  |
| Femminello Adamo (seedless)                                                   | 0.52                | 0.11 | 0.04 | 0.30                 | 1.00 | 0.98 | -                        | 1.00  | 1.00  |
| Femminello apireno Continella m84                                             | -                   | -    | -    | -                    | -    | -    | -                        | -     | 6.80  |
| Femminello Campisi (seedless)                                                 | 1.00                | 0.83 | 0.93 | 0.28                 | 0.87 | 1.00 | -                        | -     | -     |
| Femminello Cucuzzaro                                                          | -                   | 0.24 | 0.13 | -                    | 0.01 | 0.04 | 12.50                    | 20.10 | 20.03 |
| Femminello Dosaco m503                                                        | -                   | 0.53 | 0.54 | -                    | 0.28 | 0.12 | -                        | 3.40  | 6.60  |
| Femminello Fior d'Arancio                                                     | 0.92                | 0.79 | 0.48 | 0.11                 | 0.02 | 0.00 | 12.00                    | 8.60  | 14.50 |
| Femminello Germanà (seedless)                                                 | -                   | 0.47 | 0.22 | -                    | 0.97 | 0.95 | -                        | 1.00  | 2.60  |
| Femminello Greco apireno                                                      | 0.82                | 0.77 | 0.57 | 0.10                 | 0.01 | 0.08 | -                        | 2.24  | 9.30  |
| Femminello Pennisi Carrubbaro                                                 | 0.67                | 0.22 | 0.38 | 0.16                 | 0.04 | 0.00 | -                        | 10.40 | 10.90 |
| Femminello S01                                                                | -                   | -    | -    | -                    | -    | -    | -                        | -     | 7.30  |
| Femminello S02                                                                | -                   | -    | -    | -                    | -    | -    | -                        | -     | 5.70  |
| Femminello Santa Teresa                                                       | 0.10                | 0.08 | 0.05 | 0.08                 | 0.01 | 0.03 | 11.30                    | 15.20 | 18.90 |
| Femminello Scandurra (seedless)                                               | 1.00                | 0.87 | 0.82 | 0.10                 | 0.40 | 0.95 | -                        | 1.00  | 1.00  |
| Femminello Siracusano 2Kr                                                     | -                   | 0.78 | -    | -                    | 0.12 | -    | 7.00                     | 4.93  | -     |
| Femminello Siracusano m296                                                    | 0.77                | 0.31 | 0.39 | 0.15                 | 0.01 | 0.01 | 22.70                    | 16.90 | 21.40 |
| Femminello Zagara Bianca Fragalà                                              | 0.76                | 0.75 | 0.38 | 0.14                 | 0.02 | 0.14 | 6.80                     | 6.90  | 8.90  |
| Fino Iniasel 49                                                               | -                   | 0.78 | 0.54 | -                    | 0.23 | 0.57 | -                        | 12.50 | 13.50 |
| Fino Iniasel 95                                                               | 0.71                | 0.62 | 0.42 | 0.10                 | 0.27 | 0.70 | 6.00                     | 11.90 | 15.20 |
| Incappucciato m504                                                            | -                   | -    | 0.17 | -                    | -    | 0.00 | -                        | 10.30 | -     |
| Interdonato                                                                   | 0.58                | -    | 0.34 | 0.16                 | -    | 0.07 | 9.30                     | 6.60  | -     |
| Kamarina                                                                      | -                   | 0.36 | 0.17 | -                    | 1.00 | 0.92 | -                        | 0.94  | 4.30  |
| Lemox (seedless)                                                              | 0.63                | -    | -    | 0.12                 | -    | -    | -                        | 1.00  | 1.00  |
| Lisbon                                                                        | 0.80                | 0.63 | 0.45 | 0.14                 | 0.01 | 0.02 | 11.40                    | 12.50 | 12.90 |
| Lunario                                                                       | 0.94                | 0.64 | 0.67 | 0.12                 | 0.05 | 0.00 | -                        | 2.25  | 3.30  |
| Messina old line                                                              | 0.97                | -    | 0.44 | 0.10                 | -    | 0.95 | -                        | -     | -     |
| Meyer (( <i>C. maxima</i> x <i>C. reticulata</i> ) x <i>C. medica</i> hybrid) | 0.99                | -    | -    | 0.12                 | -    | -    | 11.80                    | 10.20 | 13.50 |
| Monachello Continella old line                                                | -                   | 0.31 | -    | -                    | 0.03 | -    | -                        | 2.30  | -     |
| Monachello nucellar line                                                      | 0.89                | -    | -    | 0.18                 | -    | -    | 2.70                     | 3.40  | -     |
| Ovale di Sorrento                                                             | 0.92                | 0.58 | 0.60 | 0.10                 | 0.07 | 0.03 | 12.40                    | 8.90  | 19.50 |
| Quattrocchi                                                                   | 0.69                | 0.32 | -    | 0.14                 | 0.88 | -    | -                        | 6.30  | 5.17  |
| Segesta (seedless)                                                            | -                   | -    | 0.42 | -                    | -    | 0.00 | -                        | 1.00  | 1.00  |
| Selinunte                                                                     | 0.65                | 0.58 | 0.36 | 0.14                 | 0.09 | 0.00 | 2.10                     | 4.10  | 2.20  |
| Sfusato Amalfitano                                                            | 0.70                | 0.47 | 0.25 | 0.13                 | 0.01 | 0.00 | 11.60                    | 8.80  | 16.10 |
| Verna                                                                         | 0.79                | 0.78 | 0.54 | 0.15                 | 0.03 | 0.00 | 5.70                     | 3.40  | 11.00 |

| Accession                                                                     | average seed weight (g) |      |      | number of embryos per seed |      |      | polyembryonic seeds (%) |      |      |
|-------------------------------------------------------------------------------|-------------------------|------|------|----------------------------|------|------|-------------------------|------|------|
|                                                                               | 2019                    | 2020 | 2021 | 2019                       | 2020 | 2021 | 2019                    | 2020 | 2021 |
| Adamopoulos                                                                   | -                       | 0.20 | 0.20 | -                          | 2.85 | 3.11 | 0.43                    | 0.76 | 0.84 |
| Akragas                                                                       | -                       | 0.15 | -    | -                          | 2.43 | -    | -                       | 0.22 | -    |
| Cerza                                                                         | -                       | -    | -    | -                          | -    | -    | -                       | -    | -    |
| Chaparro                                                                      | -                       | 0.15 | 0.15 | -                          | 2.76 | 2.53 | 0.43                    | 0.66 | 0.39 |
| Cirò                                                                          | -                       | 0.18 | -    | -                          | 2.00 | -    | -                       | 0.09 | -    |
| Erice                                                                         | -                       | 0.17 | 0.13 | -                          | 2.71 | 2.53 | -                       | -    | 0.58 |
| Femminello Adamo (seedless)                                                   | -                       | -    | -    | -                          | -    | -    | -                       | -    | -    |
| Femminello apireno Continella m84                                             | -                       | -    | 0.11 | -                          |      | 2.50 | -                       | -    | 0.32 |
| Femminello Campisi (seedless)                                                 | -                       | -    | -    | -                          | -    | -    | -                       | -    | -    |
| Femminello Cucuzzaro                                                          | -                       | 0.16 | 0.13 | -                          | 3.06 | 2.58 | 0.33                    | 0.41 | 0.39 |
| Femminello Dosaco m503                                                        | -                       | 0.15 | 0.14 | -                          | 2.69 | 2.67 | -                       | 0.38 | 0.52 |
| Femminello Fior d'Arancio                                                     | -                       | 0.19 | 0.13 | -                          | 2.88 | 2.22 | 0.37                    | 0.53 | 0.28 |
| Femminello Germanà (seedless)                                                 | -                       | -    | 0.14 | -                          | -    | 2.40 | -                       | -    | 0.19 |
| Femminello Greco apireno                                                      | -                       | 0.15 | 0.15 | -                          | 3.05 | 3.00 | -                       | -    | 0.45 |
| Femminello Pennisi Carrubbaro                                                 | -                       | 0.13 | 0.10 | -                          | 3.00 | 2.14 | -                       | 0.51 | 0.23 |
| Femminello S01                                                                | -                       | -    | -    | -                          | -    | -    | -                       | -    | 0.19 |
| Femminello S02                                                                | -                       | -    | -    | -                          | -    | -    | -                       | -    | 0.30 |
| Femminello Santa Teresa                                                       | -                       | 0.15 | 0.12 | -                          | 2.81 | 2.70 | 0.40                    | 0.37 | 0.38 |
| Femminello Scandurra (seedless)                                               | -                       | -    | -    | -                          | -    | -    | -                       | -    | -    |
| Femminello Siracusano 2Kr                                                     | -                       | 0.13 | -    | -                          | -    | -    | 0.43                    | 0.63 | -    |
| Femminello Siracusano m296                                                    | -                       | 0.15 | 0.12 | -                          | 3.90 | 2.94 | 0.46                    | 0.57 | 0.52 |
| Femminello Zagara Bianca Fragalà                                              | -                       | 0.16 | 0.18 | -                          | 2.95 | 2.50 | 0.27                    | 0.51 | 0.40 |
| Fino Iniasel 49                                                               | -                       | 0.16 | 0.10 | -                          | 3.00 | 2.27 | -                       | 0.55 | 0.37 |
| Fino Iniasel 95                                                               | -                       | 0.14 | 0.15 | -                          | 2.54 | 2.45 | 0.33                    | 0.36 | 0.35 |
| Incappucciato m504                                                            | -                       | 0.10 | -    | -                          | 2.33 | -    | -                       | 0.26 | -    |
| Interdonato                                                                   | -                       | 0.16 | -    | -                          | 2.33 | -    | 0.20                    | 0.07 | -    |
| Kamarina                                                                      | -                       | 0.11 | 0.12 | -                          | 2.50 | 2.16 | -                       | 0.12 | 0.21 |
| Lemox (seedless)                                                              | -                       | -    | -    | -                          | -    | -    | -                       | -    | -    |
| Lisbon                                                                        | -                       | 0.16 | 0.11 | -                          | 3.25 | 2.81 | 0.47                    | 0.62 | 0.40 |
| Lunario                                                                       | -                       | 0.09 | 0.12 | -                          | 2.33 | 2.00 | -                       | 0.10 | 0.07 |
| Messina old line                                                              | -                       | 0.14 | -    | -                          | -    | -    | -                       | -    | -    |
| Meyer (( <i>C. maxima</i> x <i>C. reticulata</i> ) x <i>C. medica</i> hybrid) | -                       | 0.13 | 0.16 | -                          | 2.20 | 0.00 | 0.17                    | 0.12 | 0.00 |
| Monachello Continella old line                                                | -                       | 0.17 | -    | -                          | 2.60 | -    |                         | 0.42 | -    |
| Monachello nucellar line                                                      | -                       | -    | -    | -                          | 2.27 | -    | 0.17                    | 0.33 | -    |
| Ovale di Sorrento                                                             | -                       | 0.18 | 0.12 | -                          | 3.09 | 2.40 | 0.50                    | 0.52 | 0.33 |
| Quattrocchi                                                                   | -                       | 0.15 | -    | -                          | 2.43 | -    | -                       | 0.23 | -    |
| Segesta (seedless)                                                            | -                       | -    | -    | -                          | -    | -    | -                       | -    | -    |
| Selinunte                                                                     | -                       | 0.15 | 0.11 | -                          | 2.88 | -    | 0.30                    | 0.46 | -    |
| Sfusato Amalfitano                                                            | -                       | 0.19 | 0.23 | -                          | 3.00 | 3.30 | 0.47                    | 0.49 | 0.33 |
| Verna                                                                         | -                       | 0.17 | 0.12 | -                          | 2.88 | 2.81 | 0.33                    | 0.27 | 0.37 |

| Accession                                                                        | germination (%) |      |      | seeds giving more than one<br>plantlet (%) |      |      |
|----------------------------------------------------------------------------------|-----------------|------|------|--------------------------------------------|------|------|
|                                                                                  | 2019            | 2020 | 2021 | 2019                                       | 2020 | 2021 |
| Adamopoulos                                                                      | 0.80            | 0.75 | 1.00 | 0.25                                       | 0.33 | 0.80 |
| Akragas                                                                          | 0.70            | -    | -    | 0.14                                       | -    | -    |
| Cerza                                                                            | 0.60            | -    | -    | 0.00                                       | -    | -    |
| Chaparro                                                                         | 0.85            | 0.90 | 0.65 | 0.12                                       | 0.17 | 0.46 |
| Cirò                                                                             | 0.25            | -    | -    | 0.00                                       | -    | -    |
| Erice                                                                            | -               | 0.60 | 0.75 | -                                          | 0.08 | 0.33 |
| Femminello Adamo (seedless)                                                      | -               | -    | -    | -                                          | -    | -    |
| Femminello apireno Continella m84                                                | 0.80            | -    | -    | 0.19                                       | -    | -    |
| Femminello Campisi (seedless)                                                    | 0.40            | -    | 0.55 | 0.25                                       | -    | 0.27 |
| Femminello Cucuzzaro                                                             | 0.60            | 0.65 | 0.75 | 0.33                                       | 0.23 | 0.33 |
| Femminello Dosaco m503                                                           | -               | 0.85 | 1.00 | -                                          | 0.18 | 0.15 |
| Femminello Fior d'Arancio                                                        | 0.70            | 0.75 | 0.55 | 0.36                                       | 0.27 | 0.64 |
| Femminello Germanà (seedless)                                                    | -               | -    | -    | -                                          | -    | -    |
| Femminello Greco apireno                                                         | -               | -    | 0.70 | -                                          | -    | 0.86 |
| Femminello Pennisi Carrubbaro                                                    | -               | 0.80 | 0.70 | -                                          | 0.19 | 0.14 |
| Femminello S01                                                                   | -               | -    | -    | -                                          | -    | -    |
| Femminello S02                                                                   | -               | -    | -    | -                                          | -    | -    |
| Femminello Santa Teresa                                                          | 0.85            | 0.75 | 0.60 | 0.41                                       | 0.40 | 0.75 |
| Femminello Scandurra (seedless)                                                  | -               | -    | -    | -                                          | -    | -    |
| Femminello Siracusano 2Kr                                                        | 0.65            | 0.90 | -    | 0.23                                       | 0.28 | -    |
| Femminello Siracusano m296                                                       | 0.90            | 0.85 | 0.65 | 0.17                                       | 0.18 | 0.08 |
| Femminello Zagara Bianca Fragalà                                                 | 0.90            | 0.90 | 0.55 | 0.17                                       | 0.17 | 0.27 |
| Fino Iniasel 49                                                                  | -               | 0.85 | 0.70 | -                                          | 0.24 | 0.21 |
| Fino Iniasel 95                                                                  | 0.95            | 0.95 | 0.85 | 0.16                                       | 0.16 | 0.06 |
| Incappucciato m504                                                               | -               | -    | -    | -                                          | -    | -    |
| Interdonato                                                                      | 0.65            | -    | -    | 0.23                                       | -    | -    |
| Kamarina                                                                         | -               | -    | 1.00 | -                                          | -    | 0.15 |
| Lemox (seedless)                                                                 | -               | -    | -    | -                                          | -    | -    |
| Lisbon                                                                           | 0.80            | 0.85 | 0.60 | 0.19                                       | 0.29 | 0.17 |
| Lunario                                                                          | 0.25            | 0.60 | 0.65 | 0.20                                       | 0.08 | 0.08 |
| Messina old line                                                                 | 0.70            | -    | -    | 0.36                                       | -    | -    |
| Meyer (( <i>C. maxima</i> x <i>C. reticulata</i> ) x <i>C. medica</i><br>hybrid) | 0.80            | 0.75 | 0.75 | 0.19                                       | 0.13 | 0.00 |
| Monachello Continella old line                                                   | -               | -    | -    | -                                          | -    | -    |
| Monachello nucellar line                                                         | 0.70            | 0.65 | -    | 0.07                                       | 0.00 | -    |
| Ovale di Sorrento                                                                | 0.90            | 0.90 | 0.85 | 0.22                                       | 0.28 | 0.29 |
| Quattrocchi                                                                      | -               | -    | -    | -                                          | -    | -    |
| Segesta (seedless)                                                               | -               | -    | -    | -                                          | -    | -    |
| Selinunte                                                                        | 0.70            | 0.75 | -    | 0.36                                       | 0.33 | -    |
| Sfusato Amalfitano                                                               | 0.90            | 0.90 | 0.85 | 0.06                                       | 0.11 | 0.18 |
| Verna                                                                            | 0.90            | 0.90 | 0.55 | 0.17                                       | 0.17 | 0.18 |

**Figure S1.** Correlation plot of the eight traits related to reproductive biology in lemon accessions considered in the present work.

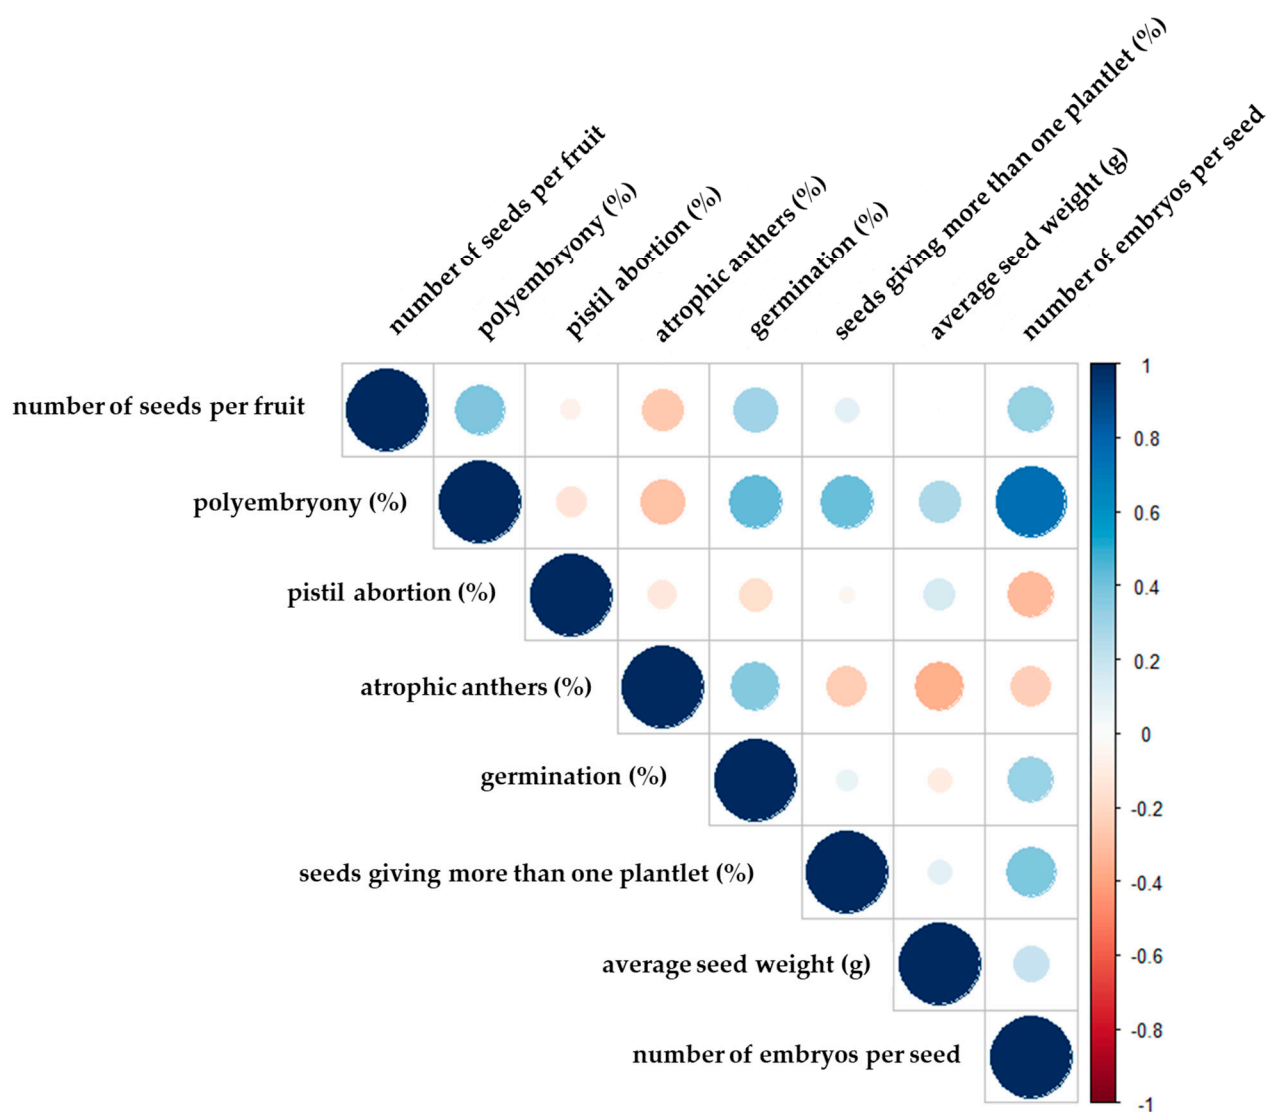

**Figure S2.** Results of MITE-CitRKD1 allele constitution analysis on a subset on the analyzed genotypes.

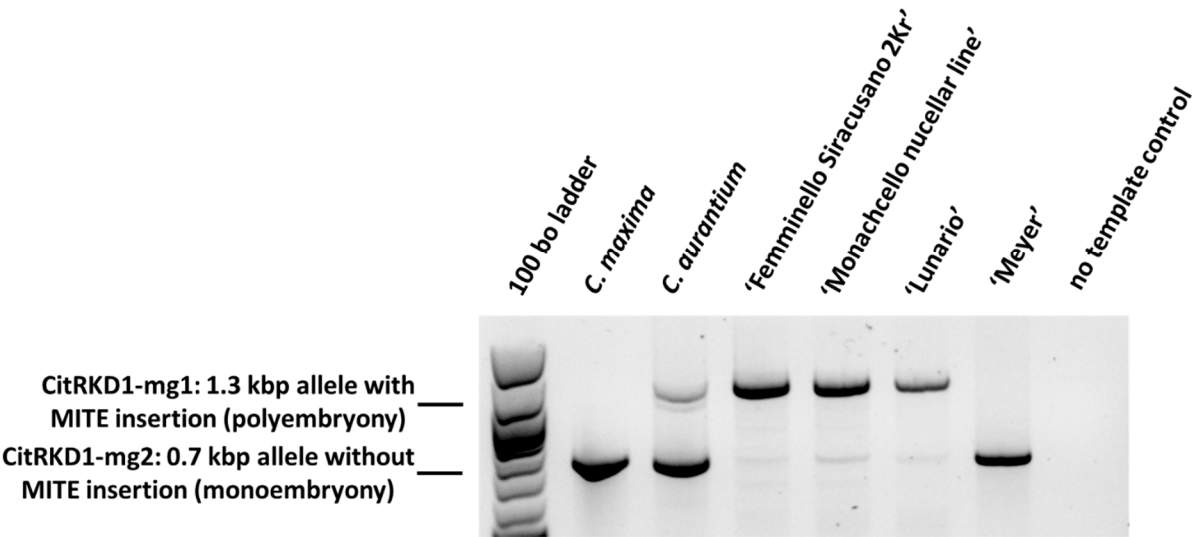

Supplement: s1 [file s1]
